# Supplementary figures and images for: Waste spunlaced facial puff derived monolithic flexible carbon framework (WCF): an ultralow-cost, recyclable and eco-friendly sorbent for oils and organic solvents
Source: Royal Society of Chemistry journal article supplement (doi:10.1039/c9ra05681e), 2019-01-01

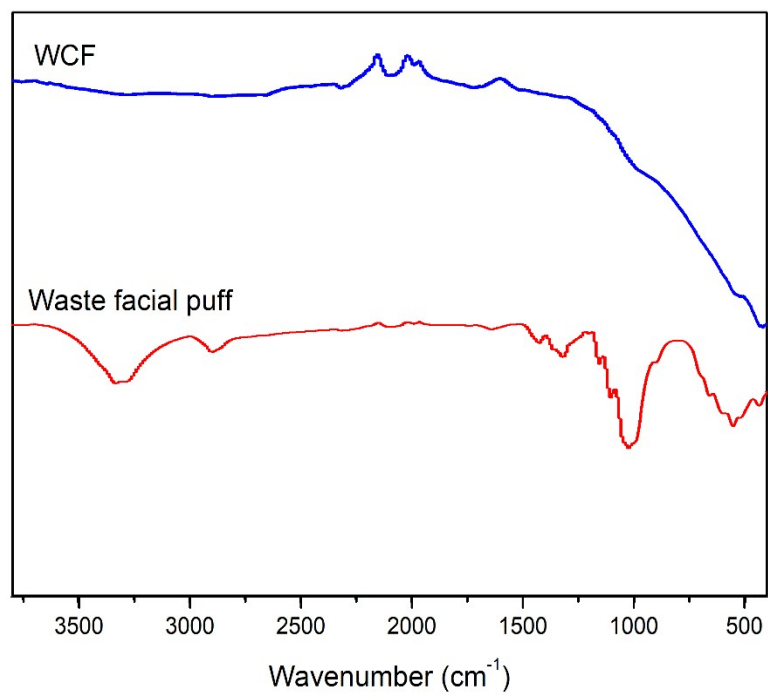

Fig.S1 The FTIR spectrum of waste facial puff and WCF

Supplement: c9ra05681e1.pdf [file c9ra05681e1.pdf]
